# Supplementary material
Source: ML conference proceedings conference paper supplement (https://openreview.net/forum?id=Deb1yP1zMN)
Supplement: supplementary_material [file attachment]

## 422 A More Implementation Benchmarks

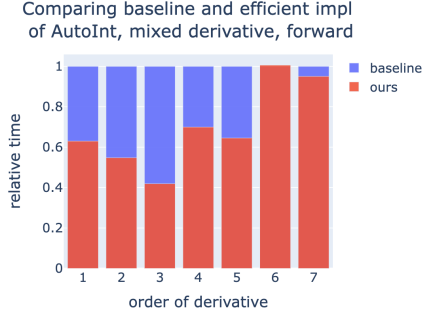

Figure 5: Forward mixed ( $d/dx_1 dx_2 \dots dx_k$ ) partial derivative computation speed, 3 layers MLP

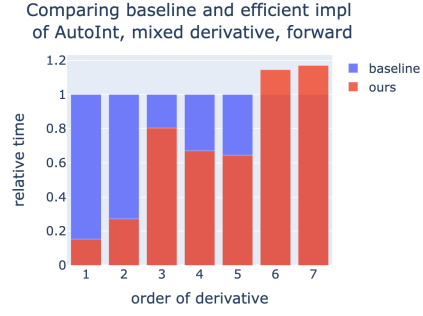

Figure 6: Forward mixed ( $d/dx_1 dx_2 \dots dx_k$ ) partial derivative computation speed, 4 layers MLP

423 As the number of MLP layers increases, the low order derivative computation becomes faster (relative to PyTorch naive implementation), where as the higher order derivative computation becomes slower.  
 424  
 425 This is because our implementation uses the Python for loop. Our implementation is faster than the  
 426 baseline in most of the case.

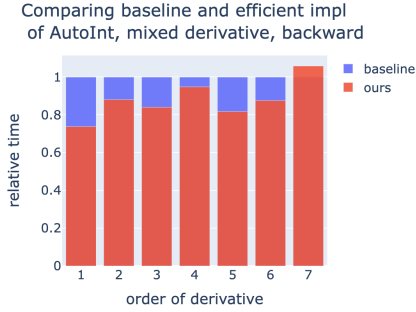

Figure 7: Forward + Backward mixed ( $d/dx_1 dx_2 \dots dx_k$ ) partial derivative computation speed, 3 layers MLP

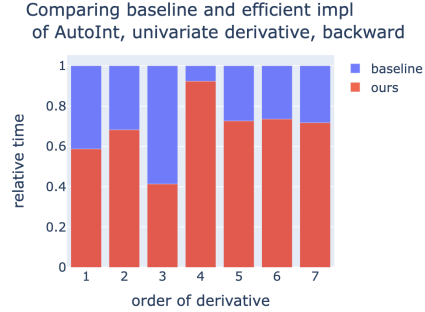

Figure 8: Forward + Backward univariate ( $d/dx_1 dx_1 \dots dx_1$ ) partial derivative computation speed, 3 layers MLP

427 When considering the backward time as well as the forward time, our implementation is still steadily  
 428 faster than the baseline. It is worth noting that our method is even faster when calculating univariate  
 429 partial derivative instead of mixed partial derivative, because the number of python for-loop iterations  
 430 is small.

## 431 B STSC and ST-Hawkes Introduction and Simulation Parameters

432 We use the same parameters as Zhou et al. [2022].

433 The STSCP's and the STHP's kernels  $g_0(\mathbf{s})$  and  $g_2(\mathbf{s}, \mathbf{s}_j)$  are prespecified to be Gaussian:

$$g_0(\mathbf{s}) := \frac{1}{2\pi} |\Sigma_{g_0}|^{-\frac{1}{2}} \exp \left( -\frac{1}{2} (\mathbf{s} - [0, 0]) \Sigma_{g_0}^{-1} (\mathbf{s} - [0, 0])^T \right)$$

$$g_2(\mathbf{s}, \mathbf{s}_j) := \frac{1}{2\pi} |\Sigma_{g_2}|^{-\frac{1}{2}} \exp \left( -\frac{1}{2} (\mathbf{s} - \mathbf{s}_j) \Sigma_{g_2}^{-1} (\mathbf{s} - \mathbf{s}_j)^T \right)$$

434 The STSCP is defined on  $\mathcal{S} = [0, 1] \times [0, 1]$ , while the STHP is defined on  $\mathcal{S} = \mathbb{R}^2$ . The STSCP's  
 435 kernel functions are normalized according to their cumulative probability on  $\mathcal{S}$ . Table 3 shows the

436 simulation parameters. The STSCP’s spatial domain is discretized as an  $101 \times 101$  grid during the  
 437 simulation.

Table 3: Parameter settings for the synthetic dataset

|                    |     | $\alpha$ | $\beta$ | $\mu$ | $\Sigma_{g0}$  | $\Sigma_{g2}$    |
|--------------------|-----|----------|---------|-------|----------------|------------------|
| ST-Hawkes          | DS1 | .5       | 1       | .2    | [.2 0; 0 .2]   | [0.5 0; 0 0.5]   |
|                    | DS2 | .5       | .6      | .15   | [5 0; 0 5]     | [.1 0; 0 .1]     |
|                    | DS3 | .3       | 2       | 1     | [1 0; 0 1]     | [.1 0; 0 .1]     |
| ST-Self Correcting | DS1 | .2       | .2      | 1     | [1 0; 0 1]     | [0.85 0; 0 0.85] |
|                    | DS2 | .3       | .2      | 1     | [.4 0; 0 .4]   | [.3 0; 0 .3]     |
|                    | DS3 | .4       | .2      | 1     | [.25 0; 0 .25] | [.2 0; 0 .2]     |

## 438 C Model Setup Details

439 We list out the detailed hyperparameter settings in Table 4. The same set parameters are used across  
 440 all datasets, except the learning rate. This demonstrate our model is robust to hyperparameters.

| Name          | Value    | Description                                                                                       |
|---------------|----------|---------------------------------------------------------------------------------------------------|
| Optimizer     | Adam     | -                                                                                                 |
| Learning rate | -        | Depends on dataset, [0.0002, 0.004]                                                               |
| Momentum      | 0.9      | Adam momentum                                                                                     |
| Epoch         | 50 / 100 | 50 for synthetic dataset and 100 for real-world dataset                                           |
| Batch size    | 128      | -                                                                                                 |
| Activation    | tanh     | Activation function in L and M (intensity parameter networks)                                     |
| nprodnet      | 2 / 10   | Number of product nets to sum in L and M<br>2 for synthetic dataset and 10 for real-world dataset |
| bias          | true     | L and M use bias in their linear layers                                                           |

Table 4: Hyperparameter settings for training AutoSTPP on all datasets.

## 441 D Forward-pass Algorithm for Automatic Integration

**Function:** dnforward(f, n, x, dims), partition(n, k) finds all k-subset partitions of  $n$

**Data:**  $n$ , dimension of  $f(x)$ ,  $x$ , a tensor of shape (batch, dim),  
 $dims$ , list of dimensions to derive,  $layers$ , composite functions in  $f$

**Result:**  $d^{dims} f / dx^{dims}$

Initialize dictionary dnf, mapping from  $dims$  to  $d^{dims} f / dx^{dims}$ , empty list pd

**if**  $dims$  is one dimensional **then**

    Compute  $f(x)$ , store intermediate outputs to dictionary  
 pd  $\leftarrow$  [all zeros but one at deriving dimension]

**else**

**for**  $subdims \in combination(dims, len(dims)-1)$  **do**

        Call dnforward(n, x, subdims), store intermediate outputs to dictionary

**end**

    pd  $\leftarrow$  [all zeros]

**end**

442

```

for  $layer \in layers$  do
  if  $layer$  is linear then
    | pd append last pd  $\times W^T$ ,  $W$  is the linear weight
  else if  $layer$  is activation then
    if  $dims$  is one dimensional then
      | termsum  $\leftarrow$  last pd  $\times$  activation first order derivative with input  $f$ 
    else
      | termsum  $\leftarrow$  0
      for  $order \in 0 \dots len(dims)$  do
        if  $order = 0$  then
          | term  $\leftarrow$  last pd
        else
          | term  $\leftarrow$  0
          for  $part \in partition(dims, order + 1)$  do
            | temp  $\leftarrow$  1. for  $subdims \in part$  do
              | temp  $\leftarrow$  temp  $\times$  dictionary value for key  $subdims$ 
              | term  $\leftarrow$  term + temp
            end
          | termsum  $\leftarrow$  termsum + term
        end
      end
      | termsum  $\leftarrow$  termsum  $\times$  activation nth order derivative with input  $f$ 
    end
  end
  | pd append termsum
end
return last pd

```

## 443 E Universal Approximation Theorem for Derivative Network

Consider an AutoInt integral network with the form

$$g(x) = C \cdot (\sigma \circ (A \cdot x + b)), \quad A \subseteq \mathbb{R}^{k \times n}, b \subseteq \mathbb{R}^k, C \subseteq \mathbb{R}^k$$

444 where  $\sigma$  denotes a  $\mathbb{R} \rightarrow \mathbb{R}$  continuous non-polynomial function applies elementwise to each compo-  
 445 nent of input.

The derivative network thus takes the form

$$g'(x) = C \cdot (\sigma' \circ (A \cdot x + b) \circ A_{col}),$$

446 where  $A_{col} \subseteq \mathbb{R}^k$  is a column of  $A$  that corresponds to the deriving dimension.

Recall the universal approximation theorem [Daniels and Velikova, 2010], which says for every compact  $K \subseteq \mathbb{R}^n$  and  $f \in C(K, \mathbb{R})$ ,  $\varepsilon > 0$ , there exist  $A, b, C$  such that

$$\sup_{x \in K} \|f(x) - g(x)\| < \varepsilon$$

447 **Proposition E.1.** (Universal Approximation Theorem for Derivative Network) for every compact  
 448  $K \subseteq \mathbb{R}^n$  and  $f \in C(K, \mathbb{R})$ ,  $\varepsilon > 0$ , there exists  $A \in \mathbb{R}^{k \times n}, b \in \mathbb{R}^k, C \in \mathbb{R}^k, \beta \in \mathbb{R}$  such that

$$g(x) := C \cdot (\sigma \circ (Ax + b)) - \beta x$$

$$\sup_{x \in K} \|f(x) - g'(x)\| < \varepsilon$$

*Proof.* Given the mapping  $f$ , by UAT there exists  $A, b, C$  that approximate  $f(x)$ . Construct  $\tilde{C} \in \mathbb{R}^k$  and  $\beta \in \mathbb{R}$ , such that

$$\tilde{C}_j = \begin{cases} C_j / A_{col,j}, & A_{col,j} \neq 0 \\ 0, & A_{col,j} = 0 \end{cases}, \quad \text{and} \quad \beta = \sum_{j | A_{col,j} = 0} C_j \sigma(b_j)$$

449 Then,

$$\begin{aligned}
& \sup_{x \in K} \|f(x) - C \cdot (\sigma \circ (A \cdot x + b))\| \\
&= \sup_{x \in K} \left\| f(x) - \sum_{j=1}^k C_j (\sigma(A_j \cdot x + b_j)) \right\| \\
&= \sup_{x \in K} \left\| f(x) - \sum_{j=1}^k \tilde{C}_j (\sigma(A_j \cdot x + b_j) A_{col,j}) - \sum_{j|A_{col,j}=0} C_j \sigma(b_j) \right\| \\
&= \sup_{x \in K} \|f(x) - \tilde{C} \cdot (\sigma' \circ (A \cdot x + b) \circ A_{col}) - \beta\|,
\end{aligned}$$

450 Note that  $\tilde{C} \cdot (\sigma' \circ (A \cdot x + b) \circ A_{col}) - \beta = \frac{d}{dx_{col}} \left( \tilde{C} \cdot (\sigma \circ (Ax + b)) - \beta x \right)$ , which is the derivative  
451 net of a two-layer feedforward integral network.

## 452 F Relationship between Number of ProdNets and Model Expressivity

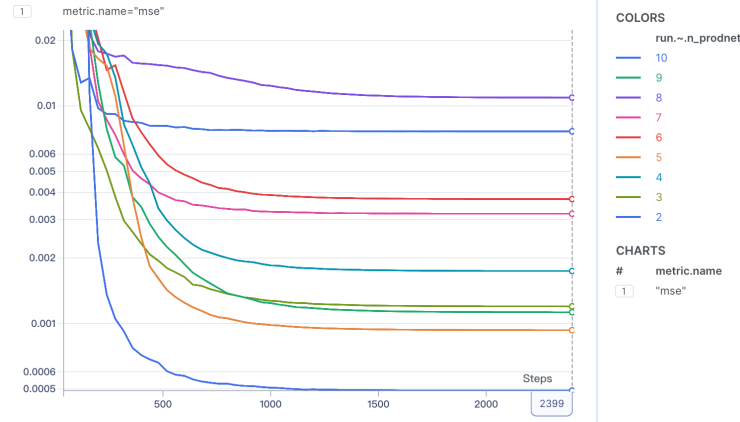

Figure 9: Training MSE for fitting a positive derivative network to  $\sin(x) \cos(y) \sin(z) + 1$

453 We applied ten summations of positive ProdNets to fit the non-multiplicative-decomposable function  
454  $\sin(x) \cos(y) \sin(z) + 1$ . Each ProdNet consisted of three MLP components, each with two hidden  
455 layers of 128 dimensions. All models were trained with a fixed learning rate of 0.005.

456 Our results, shown in Figure 9, indicate that increasing the number of ProdNets generally improves  
457 the model’s performance in fitting the non-decomposable function. The model with the best MSE was  
458 produced by using 10 ProdNets, while the model with 2 ProdNets had the second-worst performance.  
459 This is intuitively sensible, as more linear terms are typically required to precisely express an arbitrary  
460 function. However, we observed that employing more ProdNets does not always lead to better  
461 performance, as demonstrated by the model with 8 ProdNets.
